# Supplementary material for: Regulation of Glycosylphosphatidylinositol-Anchored Protein (GPI-AP) Expression by F-Box/LRR-Repeat (FBXL) Protein in Wheat (Triticum aestivum L.)
Source: MDPI journal article supplement (doi:10.3390/plants10081606), 2021-08-05
Supplement: s1 [file s1]

Supplementary Table S1. The information of primers used in this study.

| Purpose         | Gene                       | Forward primer            | Reverse primer            |
|-----------------|----------------------------|---------------------------|---------------------------|
| Gateway cloning | <i>TaFBXL</i>              | ATGGTTAGTGCAGGTCAGTGG     | TCAGTACGCATGGCTGGTGGC     |
|                 | <i>TaGPI-AP</i>            | ATGGATTCCAGGGCCGCCCTCT    | CTTCATCAGCAAACTACGAA      |
|                 | <i>TaABP1</i>              | ATGGCGAGTGGACACACAACAGCTG | TTACAGTTCATCTTTAGGTGCGTCT |
| qRT-PCR         | <i>TaFBXL</i>              | TCAGCAACCTCATGGTGT        | AAACACCGGATGCGACAA        |
|                 | <i>TaGPI-AP</i>            | CGACAACCAGCTCCTCAA        | TTCTTTGCTAGCTGCTCG        |
|                 | <i>Actin</i><br>(AB181991) | GCCACACTGTTCCAATCTA       | TGATGGAATTGTATGTCCG       |

Supplementary Table S2. The CDS and peptide sequence of the TaFBXL gene.

|                                                                                                                                                                                                                                                                                                                                                                                                                                                                                                                                                                                                                                                                                                                                                                                                                                                                                                                                                                                                                                                                                                                                                                                                                                                   |
|---------------------------------------------------------------------------------------------------------------------------------------------------------------------------------------------------------------------------------------------------------------------------------------------------------------------------------------------------------------------------------------------------------------------------------------------------------------------------------------------------------------------------------------------------------------------------------------------------------------------------------------------------------------------------------------------------------------------------------------------------------------------------------------------------------------------------------------------------------------------------------------------------------------------------------------------------------------------------------------------------------------------------------------------------------------------------------------------------------------------------------------------------------------------------------------------------------------------------------------------------|
| <b>TaFBXL_CDS sequence</b>                                                                                                                                                                                                                                                                                                                                                                                                                                                                                                                                                                                                                                                                                                                                                                                                                                                                                                                                                                                                                                                                                                                                                                                                                        |
| ATGGTTAGTGCAGGTCAGTGGACAGGCAGTTGGATACATGCTTCAGCAACCTCATGGTGTCTAGCGGC<br>GGTGAAGGGGGCAGGCTGAAACTGGTGGCGCTATGCCTATGTTGTCAGGATGGAAGGACCTGCCAATG<br>GAGCTGCTTATGCGGATCATATCAGTTGCTGGAGATGATCGAATTGTCGTTGTCGCATCCGGTGTTCG<br>ACTGGCTGGCGCGACGCGTTAGGACGGGGGGTTACTAATCTTCCCTTTTCATGGTGCCAGCAGAACATG<br>AATAACTTAACGATATCATTTGCTCACAAGTTCACAAAGCTTCAGGTTCTCACTCTTCGCCAAATCAAA<br>CCTCAGCTCGAAGACAGTGCAGTAGAGGCTGTTGCCAACTACTGTTATGATCTACGTGAGTTAGACCTC<br>AGCCGAAGTTTTTCGGCTTAGTGACCGATCGTTGTATGCATTGGCCAATGGATGTCTCGGCTTACAAAA<br>CTGAACATCAGTGGGTGTTCCAGTTTCAGTGACAGTGCCTTAATCTACCTTAGTTGCCACTGTAAAAAC<br>CTGAAGAGCTTGAATCTTTGTGGATGTGGAAGGCAGCCACTGATGAGTCCTTGCCAGGCCATAGCCCAA<br>AACTGTGGGCACCTGCAATCTTTAAACCTAGGTTGGTGTGACAATGTCACAGATGAGGGGGTTACCAGC<br>TTGGCATCAGGCTGCCCTGATCTCAGGGCCCTGGATTGTGTGGCTGTGTTCTTATAACAGACGAAAGT<br>GTTATTGCTCTAGCAAGCGGGTGCCCGTACCTGCGATCTTTGGGCCTGTACTACTGCCAGAACATCACC<br>GACCGTGCCATGTACTCCCTCGCAAACAGCTGCGTGAAGAGCAAACGAGGGAGGTGGGGCACCCTCGCGG<br>AGCAGCAGCAGCAACTCGAAGGACGTCGACGGGCTGGCTAATCTGAACATCAGCCAGTGCACGGCCCTG<br>ACGCCTCCCGCGGTTTCAGGCGGTGTCGACTCCTTCCCGTCGCTCCACACCTGCCCGGAGAGGCACTCC<br>CTCATCATCAGCGGTTGCCTCAGCCTGACTAACGTCCACTGTGCCTGCGGCCTCCAGCGCCACCGCGCC<br>GGAAGCGCCCTGCAGGCCACCAGCCATGCGTACTGA |
| <b>TaFBXL amino acid sequence</b>                                                                                                                                                                                                                                                                                                                                                                                                                                                                                                                                                                                                                                                                                                                                                                                                                                                                                                                                                                                                                                                                                                                                                                                                                 |
| MVSARSVDRQLDTCFSNLMVSSGGGRGQAETGGAMPMLSGWKDLPMELLMRIISVAGDDRIVVVASGVC<br>TGWRDALGRGVTNLSLSWCQQNMNNLTISFAHKFTKLQVLTLRQIKPQLEDSAVEAVANYCYDLRELDL<br>SRSFRLSDRSLYALANGCPRLTKLNISGCSSFSDSALIYLSCHCKNLKSLNLCGCGKAATDES LQAI AQ<br>NCGHLQSLNLGWCDNVTDEGVTS LASGCPDLRALDLCGCVLITDES VIALASGCPYLRSLGLYYCQNIT<br>DRAMYSLANSCVKS KRGRWGT PRSSSSNSKDVDGLANLNI SQCTALT PPAVQAVCD SFPSLHTC PERHS<br>LIISGCLSLTNVHCACGLQRHRAGSALQATSHAY*                                                                                                                                                                                                                                                                                                                                                                                                                                                                                                                                                                                                                                                                                                                                                                                                                        |

Supplementary Table S3. High-confidence domains and repeats in the TaFBXL protein.

| Domain name | Domain start (bp) | Domain end (bp) | e-value | SMART accession no. | Definition                            |
|-------------|-------------------|-----------------|---------|---------------------|---------------------------------------|
| F-box       | 44                | 84              | 2.0e-9  | SM000256            | A receptor for ubiquitination targets |

|        |     |     |         |          |                                                    |
|--------|-----|-----|---------|----------|----------------------------------------------------|
| LRR    | 103 | 129 | 2.0e-8  | SM000370 | Leucine-rich repeats                               |
| LRR    | 130 | 155 | 4.54e-4 |          |                                                    |
| LRR    | 156 | 181 | 1.47e-3 |          |                                                    |
| LRR    | 182 | 208 | 4.24e-4 |          |                                                    |
| LRR_CC | 209 | 234 | 2.07e-7 | SM000367 | Leucine-rich repeat, cysteine-containing subfamily |
| LRR_CC | 235 | 260 | 5.17e-8 |          |                                                    |
| LRR_CC | 261 | 286 | 2.77e-8 |          |                                                    |
| LRR    | 308 | 333 | 3.0e-8  | SM000370 | Leucine-rich repeat                                |
